# Supplementary material
Source: PubMed Central journal article supplement (PMC4404408)

Table 3: PK Parameter Analysis of Pitavastatin Lactone and EFV and Pitavastatin lactone and DRV/r

| PK Parameter for pitavastatin lactone | N  | Geometric Mean          |                   | Geometric Mean Ratio (90% CI)                 |
|---------------------------------------|----|-------------------------|-------------------|-----------------------------------------------|
|                                       |    | Pitavastatin with EFV   | Pitavastatin only |                                               |
| AUC <sub>0-T</sub> ng*hr/mL           | 14 | 221                     | 257               | 0.86 (0.73-1.01)                              |
| C <sub>max</sub> ng/mL                | 14 | 20.0                    | 20.5              | 0.98 (0.85-1.12)                              |
| T <sub>max</sub> (h) <sup>a</sup>     | 14 | 3.0 (3.0, 4.0)          | 3.5 (2.0, 4.0)    |                                               |
|                                       |    | Pitavastatin with DRV/r | Pitavastatin only | Pitavastatin with DRV/r/<br>Pitavastatin only |
| AUC <sub>0-T</sub> ug*hr/mL           | 10 | 120                     | 190               | 0.63 (0.57-0.70)                              |
| C <sub>max</sub> ug/mL                | 10 | 16.3                    | 18.5              | 0.88 (0.76-1.02)                              |
| T <sub>max</sub> (h) <sup>a</sup>     | 10 | 1.0 (0.5, 1.8)          | 2.0 (1.0, 2.0)    |                                               |

<sup>a</sup>T<sub>max</sub> reported as median (IQR)

Figure 4a: Mean Lipid Parameters (Arm A)

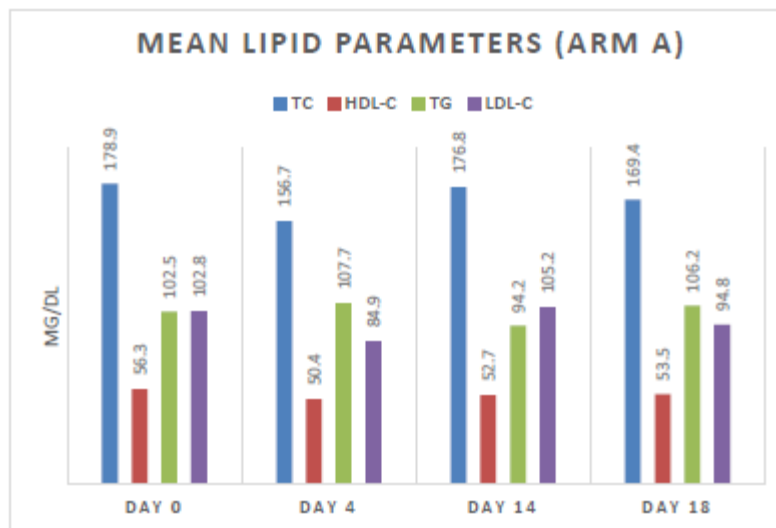

Figure 4b: Mean Lipid Parameters (Arm B)

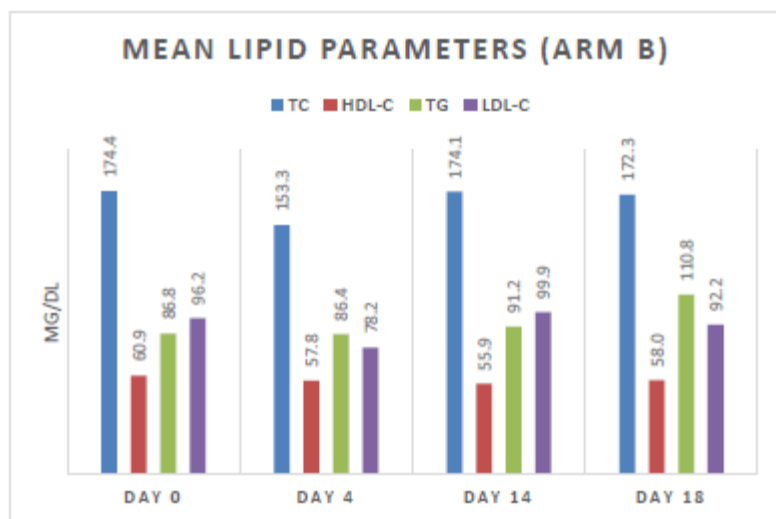

Supplement: NIHMS627850-supplement-Supplement.pdf [file NIHMS627850-supplement-Supplement.pdf]
